# Supplementary material
Source: Springer Nature journal article supplement (https://www.springermedizin.de/resource/supplementary/12874_2009_360_MOESM1_ESM.pdf/9434308)

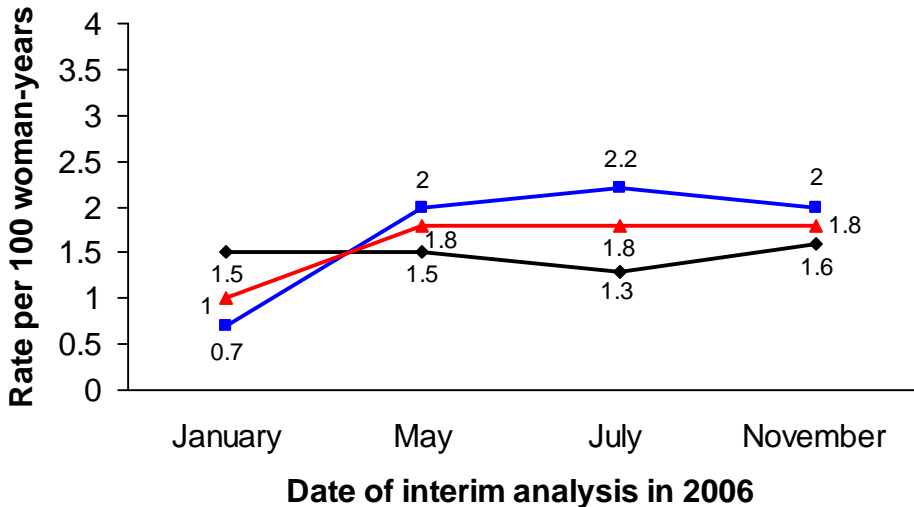

—◆— Lagos pooled —■— Port Harcourt pooled —▲— Nigeria overall

Supplement: MOESM1 [file 9434308]
